# Supplementary material
Source: PubMed Central journal article supplement (PMC8896287)

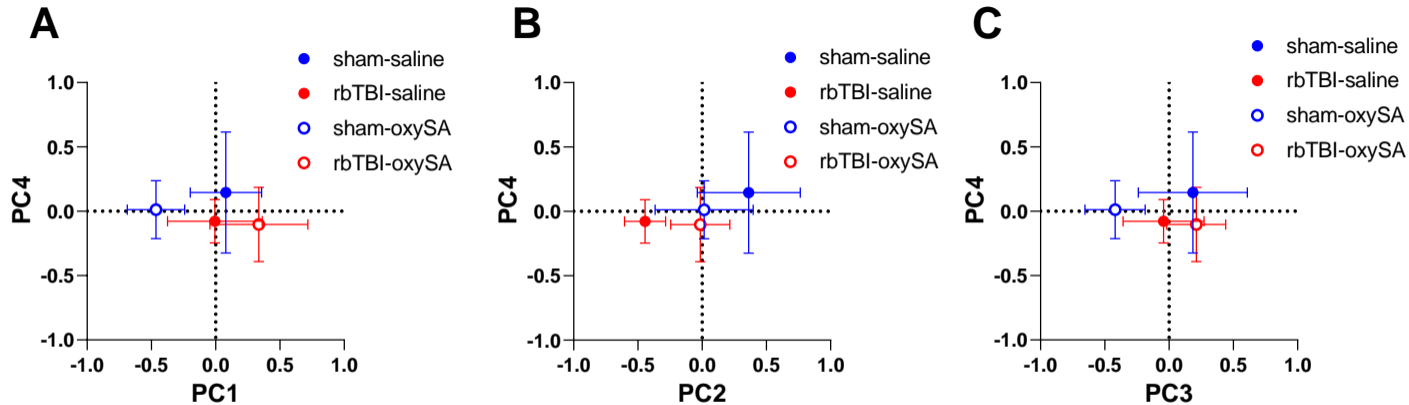

Figure S1: PC4 plotted against each other component. Symbols represent mean  $\pm$  SEM.

Supplement: NIHMS1764663-supplement-fS1.pdf [file NIHMS1764663-supplement-fS1.pdf]
